# Supplementary material for: A Sensitive High-Throughput Assay for Evaluating Host-Pathogen Interactions in Cryptococcus neoformans Infection
Source: PLoS One. 2011 Jul 28;6(7):e22773. doi: 10.1371/journal.pone.0022773 (PMC3145667; doi:10.1371/journal.pone.0022773)
Supplement: Table S2 — Comparison of automated and manual counts on control assays using Lucifer Yellow-labeled fungi and THP-1 cells. (XLS) [file pone.0022773.s002.xls]

## Sheet: Sheet1
	Automated Counts			Manual Counts
	Host nuclei	Internalized cryptococci	Cryptococci per host cell	Host nuclei	Internalized cryptococci	Cryptococci per host cell
	276a	81	0.293478	143	42	0.293706
	165	63	0.381818	123	33	0.268293
	239	89	0.372385	177	54	0.305085
	220	49	0.222727	135	55	0.407407
	265	74	0.279245	103	30	0.291262
	245	74	0.302041	121	26	0.214876
	236	72	0.305085	134	40	0.298507
	294	75	0.255102
	293	62	0.211604		Average ± SD:	0.30 ± 0.06
	296	91	0.307432
					Automated versus manual values
		Average ± SD:	0.29 ± 0.06		for cryptococci/host cell: p-value = 0.89
	aEach row represents an independently counted field.
